# Supplementary material for: NOP14 suppresses breast cancer progression by inhibiting NRIP1/Wnt/β-catenin pathway
Source: PubMed Central journal article supplement (PMC4694860; doi:10.18632/oncotarget.4573), 2015-07-13
Supplement: oncotarget-06-25701-s001.pdf [file oncotarget-06-25701-s001.pdf]

SUPPLEMENTARY MATERIALS

A

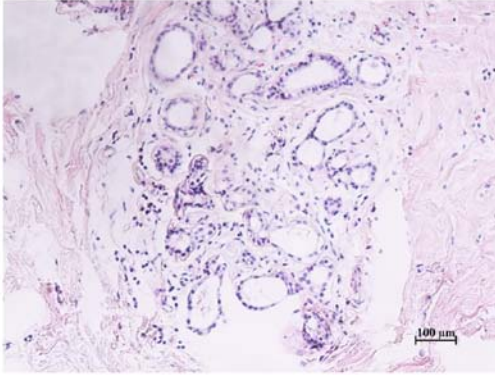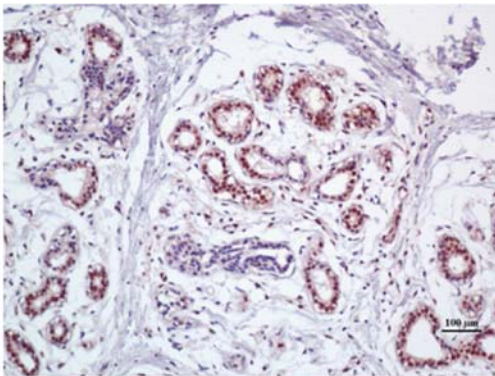

Adjacent nontumor tissue of Patient 4

B

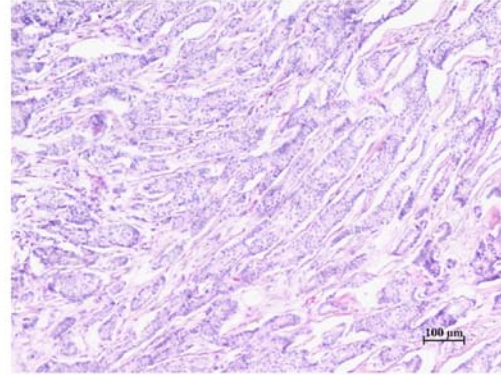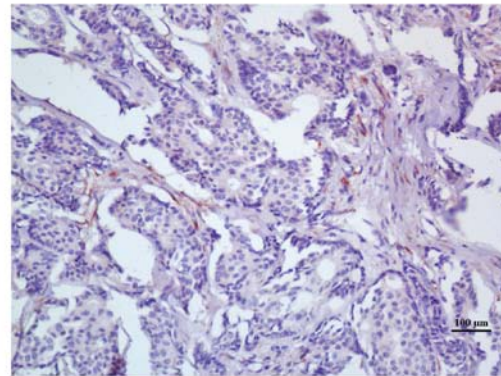

Tumor tissue of Patient 4

**Supplementary Figure S1: Expression of NOP14 in a patient.** A. Expression of NOP14 in adjacent nontumor tissue, which presents fibrocystic mammary gland disease. B. Expression of NOP14 in tumor (invasive ductal carcinoma) tissue. The two different histopathological tissues are on the same slide and NOP14 expression is tested by IHC. HE staining was showed in the upper panel.

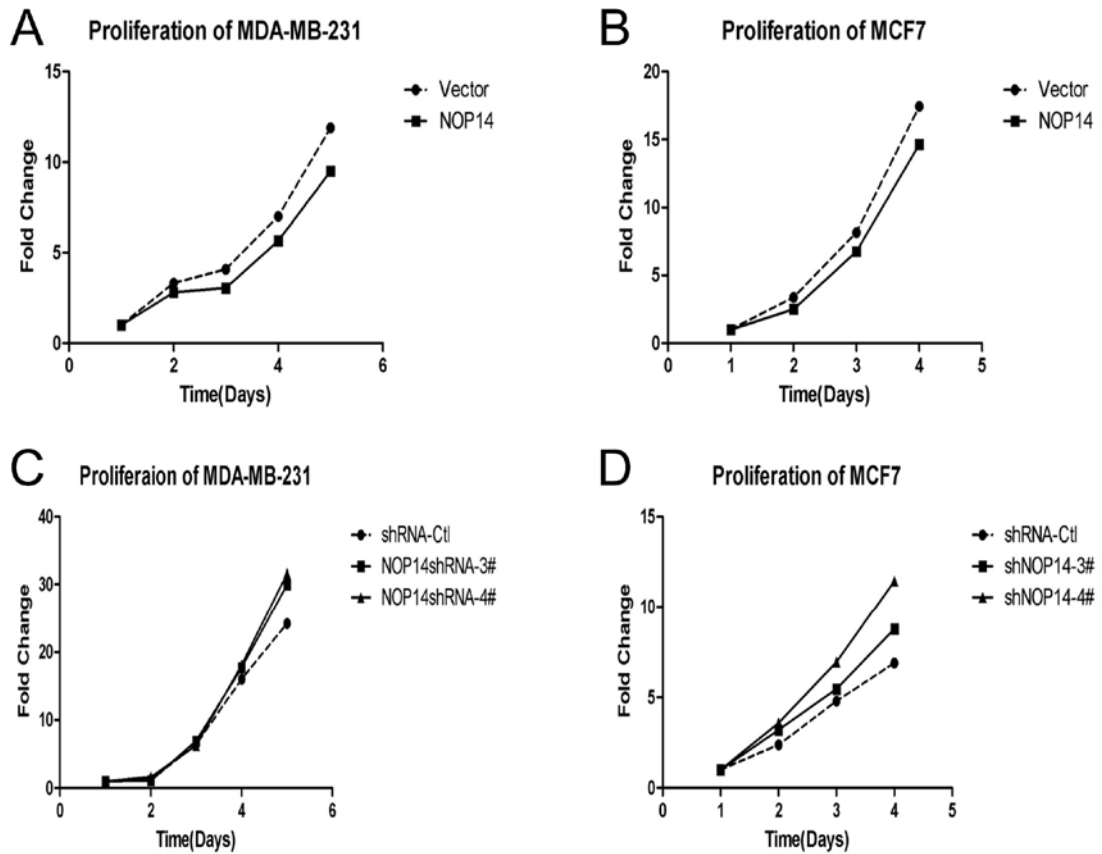

**Supplementary Figure S2: Proliferation assays of NOP14 in breast cancer cell.** **A, B.** Cell proliferation rates of NOP14-expressed and empty vector stable cells were assayed by CCK-8. The results are expressed as the mean  $\pm$  6SD of three independent experiments. **C, D.** Cell proliferation rate of NOP14 silencing and scrambled cells was assayed by CCK-8. The results are expressed as the mean  $\pm$  6SD of three independent experiments.

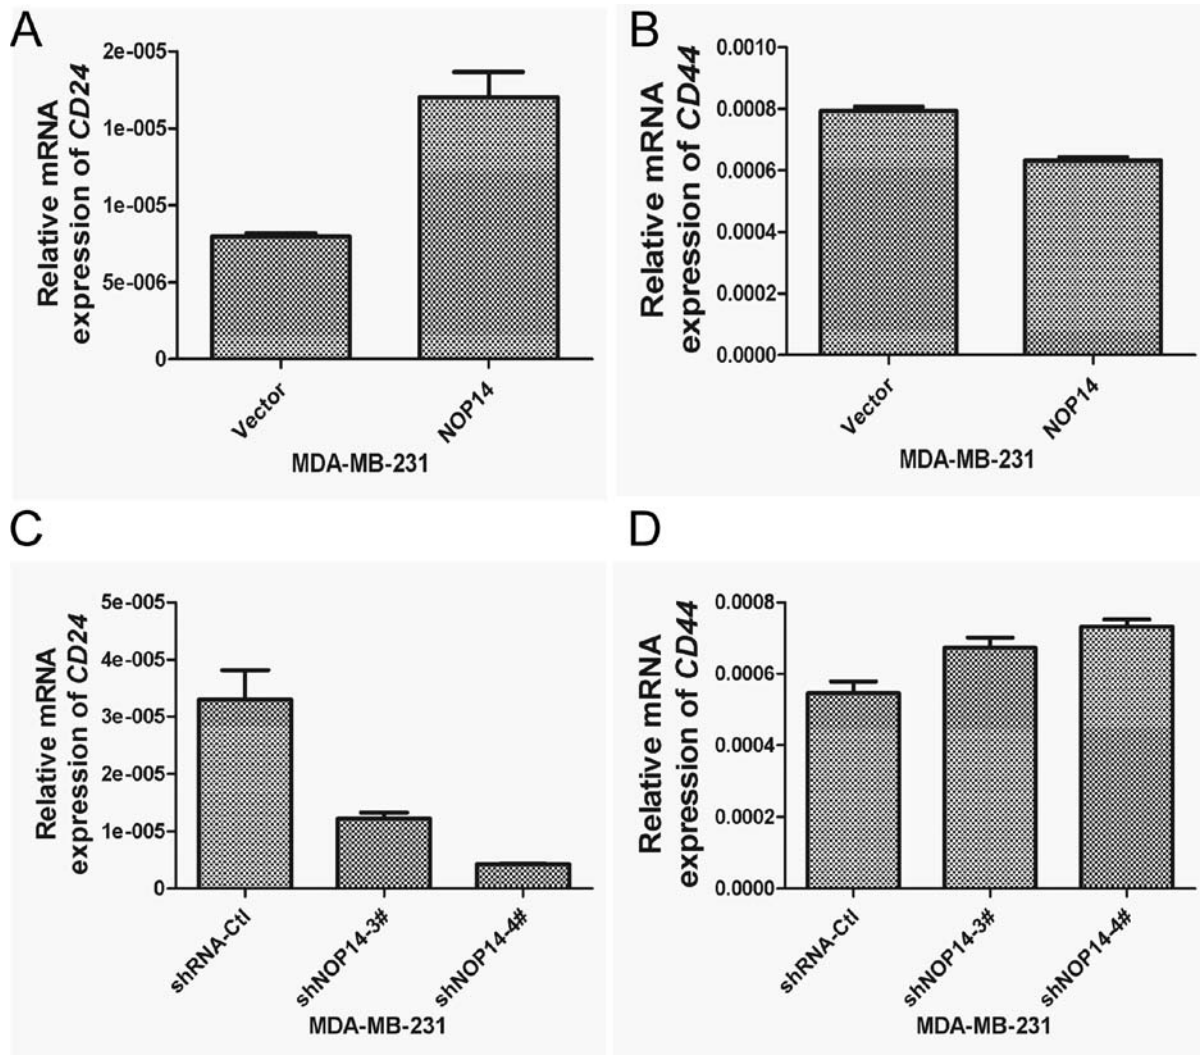

Supplementary Figure S3: qPCR assays showing relative expression levels of CD24 and CD44 in NOP14-expressed (A and B) and NOP14-silenced (C and D) and the corresponding controls.  $\beta$ -Actin was used as reference.

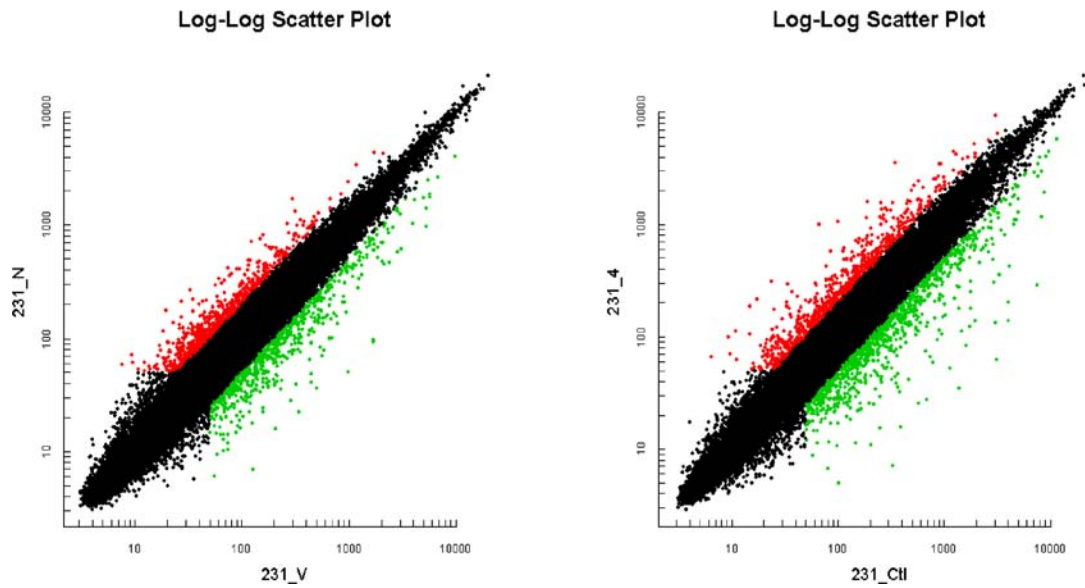

**Supplementary Figure S4: Representative scatter plot of Gene Expression Array with NOP14 -expressed and NOP14-silenced compared with corresponding control cells.** 231 is short for MDA-MB-231, N, V is short for NOP14 and Vector respectively; Ctl and 4 means scrambled shRNA Control and shNOP14-4# separately. Red dots stand for upregulated genes while green dots represents downregulated genes.

**Supplementary Table S1: The expression of NOP14 in different breast tissues**

| <b>Kinds of breast tissues</b>    | <b>No. of cases</b> | <b>Condition of NOP14 expression</b> |
|-----------------------------------|---------------------|--------------------------------------|
| Normal breast tissue              | 7                   | (+)                                  |
| Fibrocystic mammary gland disease | 95                  | (+++)                                |
| Breast carcinoma in situ          | 42                  | (+++)                                |
| Invasive breast carcinoma         | 254                 | (-)                                  |
| Metastatic breast cancer          | 63                  | (-)                                  |

**Supplementary Table S2: Relative gene expression in Gene Expression Array**

| Gene Name | NOP14/Vector |            | shNOP14-4#/shRNA-Ctl |            |
|-----------|--------------|------------|----------------------|------------|
|           | MCF7         | MDA-MB-231 | MCF7                 | MDA-MB-231 |
| NOP14     | 2.1          | 5.6262     | 0.3565               | 0.6517     |
| NRIP1     | 1.4561       | 4.9566     | 0.4208               | 0.2705     |
| LSR       | 1.1685       | 1.5012     | 0.9478               | 0.5396     |
| ZNF354A   | 1.0615       | 1.5303     | 0.9440               | 0.4896     |
| ZNF555    | 1.0645       | 1.5486     | 0.6276               | 0.5172     |
| DAPK2     | 1.4636       | 1.2276     | 0.7619*              | 0.9246     |
| CRNDE     | 1.0281       | 1.1043     | 0.9750               | 0.7131     |
| SCNN1B    | 1.3595       | 0.7999*    | 0.9165               | 0.6971*    |
| AMELX     | 1.5411       | 1.1115     | 0.8742               | 0.7325     |
| C6orf145  | 1.6314       | 1.0653     | 0.6161*              | 0.5707     |
| SEPP1     | 1.1301*      | 1.4093     | 0.6166*              | 0.9952     |
| CSF2      | 1.1579       | 1.6255     | 0.8363               | 0.1399     |
| NCEH1     | 0.9602*      | 0.3362     | 1.547                | 2.2349     |
| CALU      | 0.9254       | 0.476      | 1.4766               | 2.3579     |
| HSP90AA4P | 0.9663       | 0.6335     | 1.0143               | 2.6998     |
| GALNT10   | 0.5176       | 0.7483*    | 1.0491               | 2.0158*    |
| RRM2      | 0.8959       | 0.6889     | 1.4890               | 3.4623     |
| CCND1     | 0.8871       | 0.6544     | 1.5253               | 1.2067     |
| PCYOX1L   | 0.8278       | 0.8172     | 1.2396               | 1.2159     |
| POLD2     | 0.9162       | 0.9732     | 1.1304               | 1.1132     |
| SRA1      | 0.6727       | 0.9784     | 1.0628               | 1.2754     |
| ODC1      | 0.7703       | 0.9516     | 1.4138               | 1.2487     |

\*the level of gene expression is very low, the ratio might be unreliable.

**Supplementary Table S3: Tumor weight and wet weight of lungs of nude mice model**

| Tumor weight (mg) |       |           |            | Wet weight of lungs (mg) |       |           |            |
|-------------------|-------|-----------|------------|--------------------------|-------|-----------|------------|
| Vector            | NOP14 | shRNA-Ctl | ShNOP14-4# | Vector                   | NOP14 | shRNA-Ctl | ShNOP14-4# |
| 477               | /     | 60        | 400        | 603                      | 395   | 253       | 393        |
| 369               | /     | 54        | 392        | 502                      | 373   | 247       | 319        |
| 271               | /     | 25        | 172        | 433                      | 323   | 192       | 298        |
| 71                | /     | 11        | 85         | 411                      | 323   | 190       | 281        |
| 70                | /     | 9         | 75         | 403                      | 315   |           | 273        |
| 64                | /     | 8         | 73         | *                        | 277   |           | 271        |
| 57                | /     | /         | 72         | *                        | 271   |           | 262        |
| 39                | /     |           |            | *                        | 256   |           |            |
| 34                | /     |           |            | *                        | 229   |           |            |
| 20                | /     |           |            |                          |       |           |            |
| 10                |       |           |            |                          |       |           |            |

/, no tumor formed; \*mouse died during the observation.

**Supplementary Table S4: Primer sequences of qPCR**

| Gene Symbol                     | Forward Sequence        | Reverse Sequence           |
|---------------------------------|-------------------------|----------------------------|
| <i>NOP14</i>                    | GAAGTCCCGGAAAGAGCTGA    | TGCATCGGGCTTGGGTTTTT       |
| <i>NR1P1</i>                    | AATGTGCACTTGAGCCATGATG  | TCGGACACTGGTAAGGCAGG       |
| <i>APC</i>                      | TAGGGCTAGGCAGGCTGTG     | CTGCACCAATACAGCCACAT       |
| <i><math>\beta</math>-Actin</i> | AGATGTGGATCAGCAAGCAGGAG | CGCAAGTTAGGTTTTGTCAAGAAAGG |
| <i>CD24</i>                     | GCGCATTTTGCAGTCTGAGT    | CACTGGAATAAATCTGCGTGGG     |
| <i>CD44</i>                     | TCCCTCCGTCTTAGGCTCACT   | TATTCAAATCGATCTGCGCCA      |



**Supplementary Table S5: Antibodies presentations**

| Short name       | Full name                                           | Company                   | Cat. NO. |
|------------------|-----------------------------------------------------|---------------------------|----------|
| NOP14            | Anti-Nucleolar protein 14 antibody                  | abcam                     | ab72741  |
| NRIP1            | RIP140 Antibody                                     | Santa Cruz Biotechnology  | sc-8997  |
| GSK-3 $\beta$    | GSK-3 $\beta$ (27C10) Rabbit mAb                    | Cell Signaling Technology | #9315    |
| pGSK-3 $\beta$   | Phospho-GSK-3 $\beta$ (Ser9) (5B3) Rabbit mAb       | Cell Signaling Technology | #9323    |
| $\beta$ -Catenin | $\beta$ -Catenin (D10A8) XP <sup>®</sup> Rabbit mAb | Cell Signaling Technology | #8480    |
| ER $\alpha$      | Estrogen Receptor $\alpha$ (D8H8) Rabbit mAb        | Cell Signaling Technology | #8644    |
| $\beta$ -Actin   | $\beta$ -Actin (13E5) Rabbit mAb                    | Cell Signaling Technology | #4970    |
| GAPDH            | Anti-GAPDH antibody                                 | abcam                     | ab75479  |
| Flag             | Anti-FLAG M1 monoclonal antibody                    | Sigma-Aldrich             | F3040    |
